# Supplementary material for: Fluorescence detection of the human angiotensinogen protein by the G-quadruplex aptamer
Source: Royal Society of Chemistry journal article supplement (doi:10.1039/d2an01057g), 2022-01-01
Supplement: d2an01057g1.pdf [file d2an01057g1.pdf]

1 **Supporting Information**

2 **Fluorescent Detection of Human Angiotensinogen Protein by G-quadruplex Aptamer**

3

4 Hui Xi,<sup>†</sup> Hanlin Jiang,<sup>†</sup> Mario Juhas,<sup>‡</sup> and Yang Zhang<sup>\*,†</sup>

5

6 <sup>†</sup> College of Science, Harbin Institute of Technology (Shenzhen), Shenzhen, Guangdong, 518055,  
7 China.

8 <sup>‡</sup> Medical and Molecular Microbiology Unit, Department of Medicine, Faculty of Science and  
9 Medicine, University of Fribourg, Fribourg, 1700, Switzerland.

10

11 \* To whom correspondence should be addressed. Email: [zhangyang07@hit.edu.cn](mailto:zhangyang07@hit.edu.cn)

12

13 *Optimization of NMM conditions*

14 The optimal conditions of NMM were determined by enzyme labeling instrument and fluorescence  
15 spectrometer. Red shift occurred with the increase of concentration. The excitation wavelength and  
16 emission wavelength of NMM / G-quadruplex are 399 nm and 610 nm respectively.<sup>1</sup> As shown in  
17 Figure S1 A, the absorption spectrum of NMM (0~100  $\mu\text{M}$ ) (OD is the optical density and represents  
18 the absorbance), NMM is 0~10  $\mu\text{M}$  excitation spectrum (Figure S1 B). The concentration range  
19 with excitation wavelength of 399 nm and emission wavelength of 610 nm was selected. NMM at  
20 0~4  $\mu\text{M}$  fluorescence spectrum (Figure S1 C). The relationship between NMM concentration and  
21 fluorescence intensity (Figure S1 D). The NMM itself has weak fluorescence, 0.6  $\mu\text{M}$  can be used  
22 as a reference standard for subsequent experimental conditions. The fluorescence spectrum of NMM  
23 / C20-4 min (Figure S1 E) increased significantly with the increase of G-quadruplex (C20-4 min)  
24 concentration. The fluorescence spectrum of NMM / NC (Figure S1 F) did not change significantly  
25 with the increase of nucleic acid concentration of non-G-quadruplex structure (NC). The nucleic  
26 acid concentrations are 0, 0.001  $\mu\text{M}$ , 0.005  $\mu\text{M}$ , 0.01  $\mu\text{M}$ , 0.05  $\mu\text{M}$ , 0.1  $\mu\text{M}$ , 0.2  $\mu\text{M}$ , 0.3  $\mu\text{M}$ , 0.4  
27  $\mu\text{M}$ , 0.5  $\mu\text{M}$ .

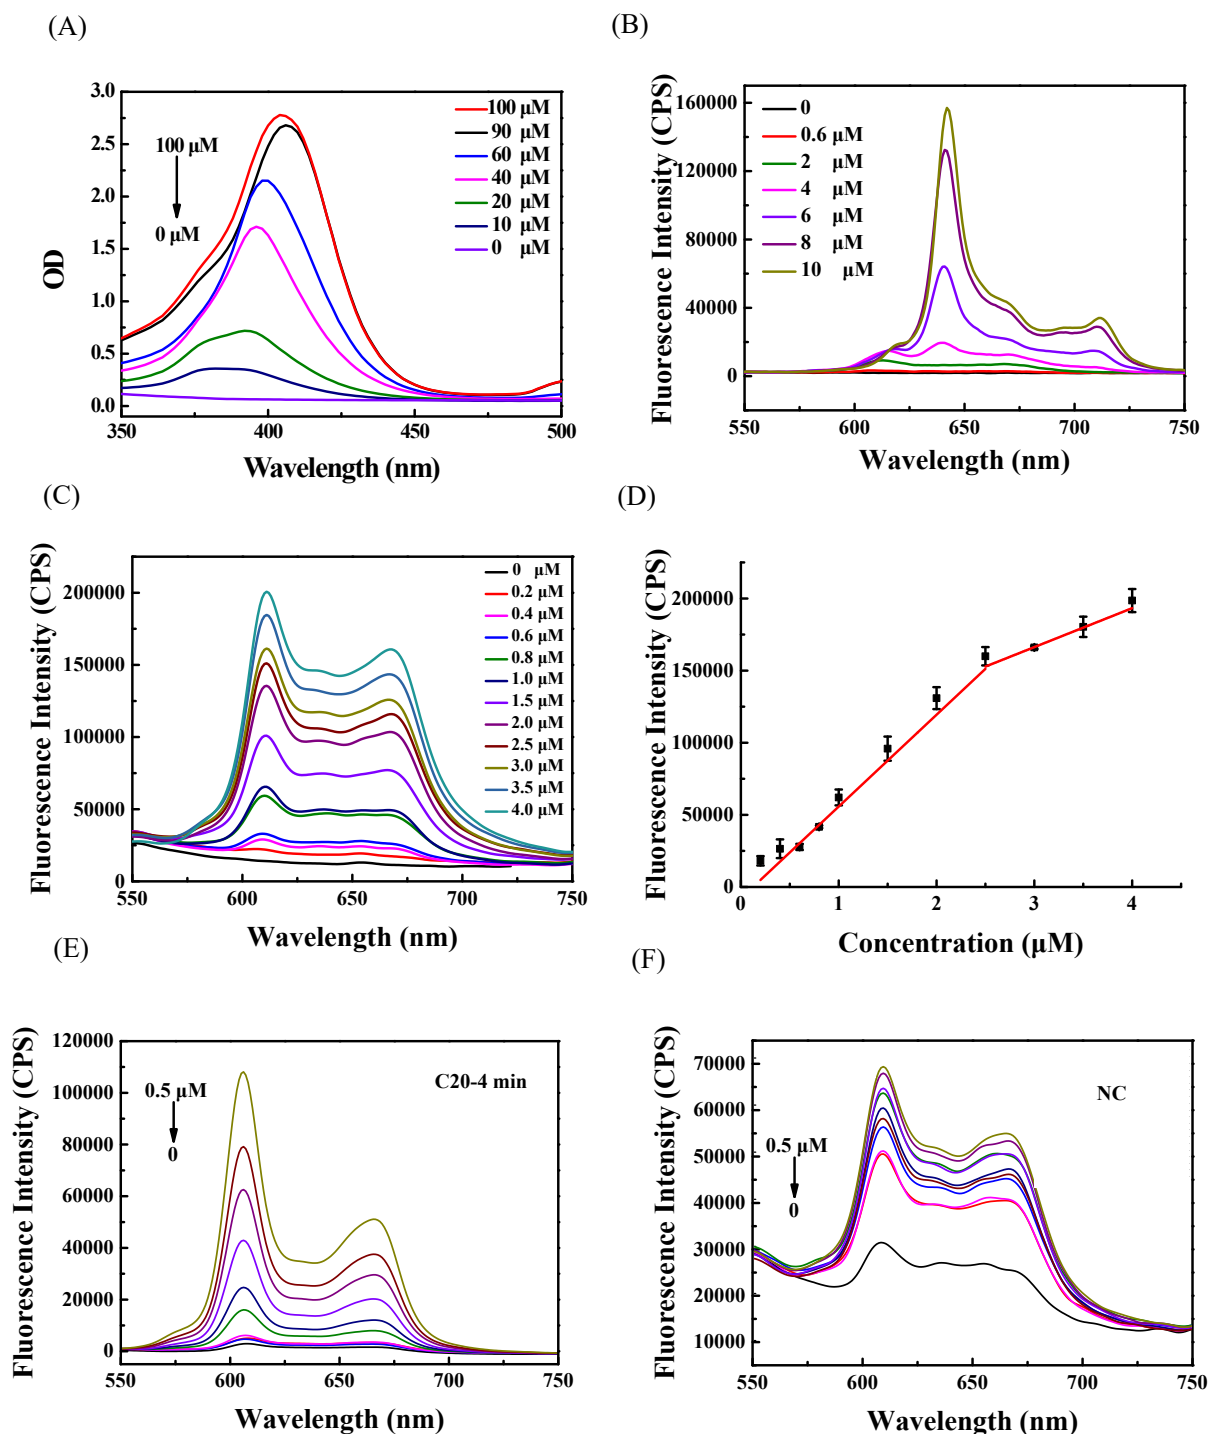

28

29 **Figure S1. NMM conditions for NMM/G-quadruplex.** (A) The absorption spectrum of NMM  
 30 (0~100  $\mu\text{M}$ ), analysis of NMM excitation wavelength and concentration. (B) The excitation  
 31 spectrum of NMM (0~10  $\mu\text{M}$ ), optimization of emission wavelength and concentration of NMM.  
 32 (C) Fluorescence spectrum of NMM (0~4  $\mu\text{M}$ ). (D) The relationship between NMM concentration  
 33 and fluorescence intensity (0~4  $\mu\text{M}$ ). (E) Fluorescence spectra of NMM / C20-4 min (0-0.5  $\mu\text{M}$ ).  
 34 (F) Fluorescence spectra of NMM / NC (0-0.5  $\mu\text{M}$ ). To analyze the effect of nucleic acid  
 35 concentration on NMM.

36

37 *Effect of metal ions on G-quadruplex*

38 The effect of different metal ion solutions on the fluorescence intensity of "NMM / C20-4 min"  
39 system was studied. The fluorescence intensity of the system increased significantly with the  
40 increase of  $K^+$  concentration (Figure S2 A). Increased  $Li^+$  concentration doesn't impact significantly  
41 the fluorescence intensity of the system (Figure S2 B). Metal ions affect the formation of G-  
42 quadruplex structure,  $K^+$  promotes the formation of parallel G-quadruplex, and  $Li^+$  is not conducive  
43 to the formation of G-quadruplex. The gradient concentration of metal ions is 100  $\mu M$ , 50  $\mu M$ , 10  
44  $\mu M$ , 5  $\mu M$ , 1  $\mu M$ , 0.5  $\mu M$ , 0.1  $\mu M$ ,  $5 \times 10^{-2} \mu M$ ,  $10^{-2} \mu M$ ,  $5 \times 10^{-3} \mu M$ ,  $10^{-3} \mu M$ ,  $5 \times 10^{-4} \mu M$ ,  $10^{-4} \mu M$ ,  
45  $5 \times 10^{-5} \mu M$ .

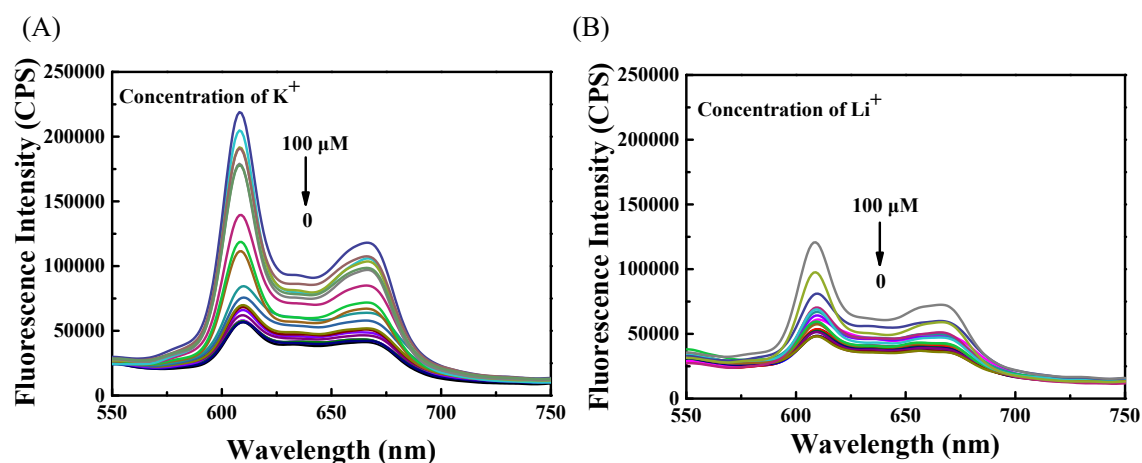

46 **Figure S2. Analysis of the stability of G-quadruplex to different metal ions.** (A) Fluorescence  
47 spectra of NMM / C20-4 min in  $K^+$  (1~100  $\mu M$ ). (B) Fluorescence spectra of NMM / C20-4 min in  
48  $Li^+$  (1~100  $\mu M$ ).

49

50 **References**

51 1 A. Kreig, J. Calvert, J. Sanoica, E. Cullum, R. Tipanna and S. Myong, *Nucleic Acids Res.*, 2015,  
52 43, 7961-7970.
